# Supplementary material
Source: PubMed Central journal article supplement (PMC3982692)
Supplement: 0ff79aeae226b2a9ecf61a717730244e_genetics.114.161661-1.pdf [file 0ff79aeae226b2a9ecf61a717730244e_genetics.114.161661-1.pdf]

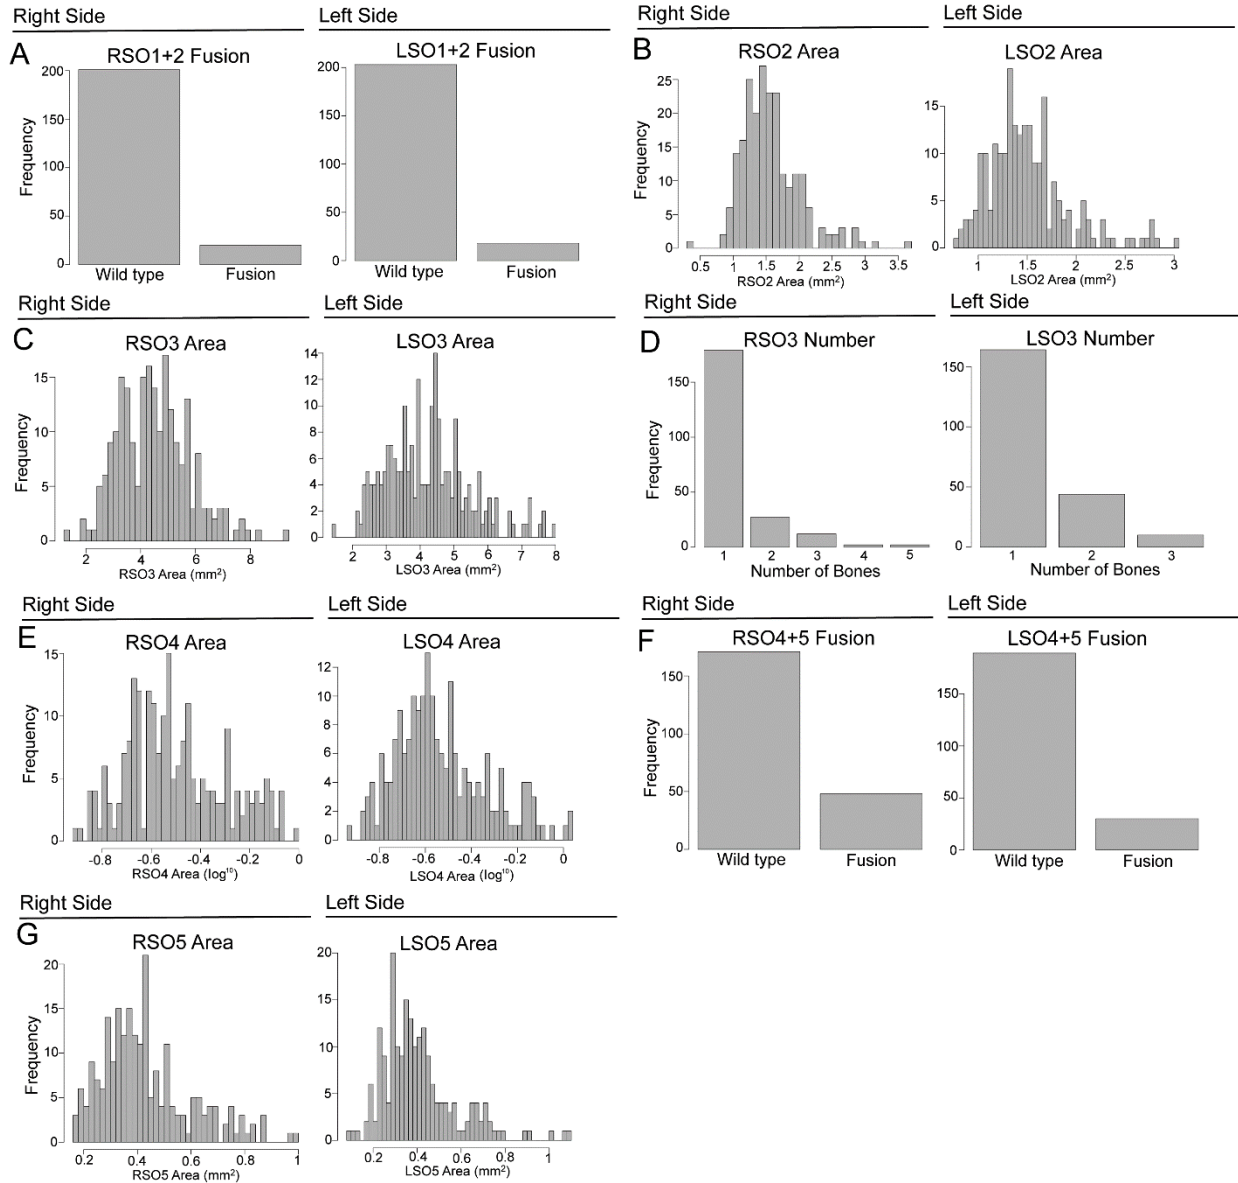

**Figure S1** Frequency distributions of seven craniofacial traits demonstrating a heritable basis. Fusion of the first and second suborbital bones (A) and fragmentation of the third suborbital bone (D) occur with approximately equal frequency on the left and right sides of the head, despite a detectable genetic basis being observed on the right side only. The total area of the second suborbital bone (B), third suborbital bone (C) and fifth suborbital bone (G) demonstrated a roughly normal distribution in our mapping pedigree. The fourth suborbital bone demonstrated a positively skewed distribution until we transformed our phenotypic measurements with a  $\log^{10}$  transformation (E). Fusion of the fourth and fifth suborbital bones (F) occurred with approximately equal frequency on the left and right sides of the head, despite a detectable genetic basis being observed on the left side only.

**Tables S1-S2**

Available for download as Excel files at <http://www.genetics.org/lookup/suppl/doi:10.1534/genetics.114.161661/-/DC1>

**Table S1** Raw phenotypic measurements of craniofacial and other traits evaluated in this study.

**Table S2** Genotypic data used for linkage group calculations and QTL analyses.

**Table S3 Summary of ANOVA and covariate analyses of sex and craniofacial QTL.**

| Trait                      | DF  | ANOVA          |             |         |                 | Covariate Analysis       |                        |                                    | Method |
|----------------------------|-----|----------------|-------------|---------|-----------------|--------------------------|------------------------|------------------------------------|--------|
|                            |     | Sum of Squares | Mean Square | F-value | P-value         | Significant Marker (LOD) | LOD Covariate - Sex    | Associated Marker (P-value)        |        |
| RSO1+2 Fusion              | 1   | 0.456          | 0.45564     | 1.823   | 0.1784          | -                        | -                      | 215D (0.998); 229B (0.656)         | HK     |
|                            | 213 | 53.237         | 0.24994     |         |                 |                          |                        |                                    |        |
| RSO2 Area                  | 1   | 0.373          | 0.37295     | 1.4899  | 0.2236          | -                        | -                      | 110B (0.783); 229B (0.777)         | HK     |
|                            | 213 | 53.32          | 0.25033     |         |                 |                          |                        |                                    |        |
| <b>RSO2 Area Residuals</b> | 1   | 2.24           | 2.24047     | 9.275   | <b>0.0026*</b>  | <b>227A</b> (LOD 5.38)   | <b>227A</b> (LOD 3.84) | <b>227A (0.032**)</b>              | HK     |
|                            | 213 | 51.453         | 0.24156     |         |                 |                          |                        |                                    |        |
| <b>LSO2 Area</b>           | 1   | 1.496          | 1.49606     | 6.105   | <b>0.0143*</b>  | -                        | -                      | NYU27 (0.86); 229B (0.761)         | EM     |
|                            | 210 | 51.461         | 0.24505     |         |                 |                          |                        |                                    |        |
| <b>LSO2 Area Residuals</b> | 1   | 4.013          | 4.0128      | 17.217  | <b>0.00005*</b> | <b>227A</b> (LOD 5.35)   | <b>227A</b> (LOD 4.15) | <b>227A (0.012**)</b>              | HK     |
|                            | 210 | 48.945         | 0.2331      |         |                 |                          |                        |                                    |        |
| RSO3 Area                  | 1   | 0.16           | 0.16048     | 0.6384  | 0.4252          | -                        | -                      | 55B (0.167); 229B (0.065)          | HK     |
|                            | 214 | 53.798         | 0.25139     |         |                 |                          |                        |                                    |        |
| RSO3 Area Residuals        | 1   | 0.014          | 0.013598    | 0.0539  | 0.8166          | -                        | -                      | -                                  | MR     |
|                            | 214 | 53.945         | 0.252078    |         |                 |                          |                        |                                    |        |
| LSO3 Area                  | 1   | 0.15           | 0.15017     | 0.5969  | 0.4406          | <b>55B</b> (LOD 4.02)    | <b>55B</b> (LOD 3.83)  | <b>55B (0.039**);</b> 229B (0.082) | HK     |
|                            | 210 | 52.831         | 0.25158     |         |                 |                          |                        |                                    |        |
| LSO3 Area Residuals        | 1   | 0.005          | 0.004662    | 0.0185  | 0.892           | -                        | -                      | 203F (0.057)                       | EM     |
|                            | 210 | 52.976         | 0.252269    |         |                 |                          |                        |                                    |        |
| RSO3 Number                | 1   | 0.025          | 0.025239    | 0.1001  | 0.752           | <b>206A</b> (LOD 5.34)   | <b>206A</b> (LOD 5.62) | <b>206A (0.003**)</b>              | HK     |
|                            | 214 | 53.933         | 0.252024    |         |                 |                          |                        |                                    |        |
| RSO4 Area                  | 1   | 0.034          | 0.033822    | 0.1342  | 0.7145          | -                        | -                      | -                                  | MR     |
|                            | 214 | 53.948         | 0.252092    |         |                 |                          |                        |                                    |        |
| RSO4 Area Residuals        | 1   | 0.597          | 0.59699     | 2.3931  | 0.1233          | -                        | -                      | -                                  | -      |
|                            | 214 | 53.384         | 0.24946     |         |                 |                          |                        |                                    |        |

|                     |     |        |          |        |        |   |   |              |    |
|---------------------|-----|--------|----------|--------|--------|---|---|--------------|----|
| LSO4 Area           | 1   | 0.304  | 0.30388  | 1.2106 | 0.2726 | - | - | 229B (0.464) | EM |
|                     | 193 | 48.445 | 0.25101  |        |        |   |   |              |    |
| LSO4 Area Residuals | 1   | 0.357  | 0.35721  | 1.4247 | 0.2341 | - | - | -            | -  |
|                     | 193 | 48.392 | 0.25073  |        |        |   |   |              |    |
| LSO4+5 Fusion       | 1   | 0.054  | 0.053678 | 0.213  | 0.6449 | - | - | -            | MR |
|                     | 211 | 53.167 | 0.251976 |        |        |   |   |              |    |
| RSO5 Area           | 1   | 0.068  | 0.068261 | 0.2709 | 0.6032 | - | - | NYU53 (0.23) | HK |
|                     | 214 | 53.913 | 0.251931 |        |        |   |   |              |    |
| RSO5 Area Residuals | 1   | 0.695  | 0.69548  | 2.7931 | 0.0961 | - | - | -            | -  |
|                     | 214 | 53.286 | 0.249    |        |        |   |   |              |    |
| LSO5 Area           | 1   | 0.011  | 0.011236 | 0.0445 | 0.8331 | - | - | -            | MR |
|                     | 193 | 48.727 | 0.252473 |        |        |   |   |              |    |
| LSO5 Area Residuals | 1   | 0.132  | 0.13198  | 0.5241 | 0.47   | - | - | -            | MR |
|                     | 193 | 48.606 | 0.25185  |        |        |   |   |              |    |

\* Indicates ANOVA result significant at  $p < 0.05$

\*\* Indicates covariate analysis result significant at  $p < 0.05$
