# Supplementary material
Source: PubMed Central journal article supplement (PMC3982692)
Supplement: 2df4d2bc896fcfbff8621dd4ddbfcf74_genetics.114.161661-3.pdf [file 2df4d2bc896fcfbff8621dd4ddbfcf74_genetics.114.161661-3.pdf]

**Table S3 Summary of ANOVA and covariate analyses of sex and craniofacial QTL.**

| Trait                      | DF  | ANOVA          |             |         |                 | Covariate Analysis       |                        |                                    | Method |
|----------------------------|-----|----------------|-------------|---------|-----------------|--------------------------|------------------------|------------------------------------|--------|
|                            |     | Sum of Squares | Mean Square | F-value | P-value         | Significant Marker (LOD) | LOD Covariate - Sex    | Associated Marker (P-value)        |        |
| RSO1+2 Fusion              | 1   | 0.456          | 0.45564     | 1.823   | 0.1784          | -                        | -                      | 215D (0.998); 229B (0.656)         | HK     |
|                            | 213 | 53.237         | 0.24994     |         |                 |                          |                        |                                    |        |
| RSO2 Area                  | 1   | 0.373          | 0.37295     | 1.4899  | 0.2236          | -                        | -                      | 110B (0.783); 229B (0.777)         | HK     |
|                            | 213 | 53.32          | 0.25033     |         |                 |                          |                        |                                    |        |
| <b>RSO2 Area Residuals</b> | 1   | 2.24           | 2.24047     | 9.275   | <b>0.0026*</b>  | <b>227A</b> (LOD 5.38)   | <b>227A</b> (LOD 3.84) | <b>227A (0.032**)</b>              | HK     |
|                            | 213 | 51.453         | 0.24156     |         |                 |                          |                        |                                    |        |
| <b>LSO2 Area</b>           | 1   | 1.496          | 1.49606     | 6.105   | <b>0.0143*</b>  | -                        | -                      | NYU27 (0.86); 229B (0.761)         | EM     |
|                            | 210 | 51.461         | 0.24505     |         |                 |                          |                        |                                    |        |
| <b>LSO2 Area Residuals</b> | 1   | 4.013          | 4.0128      | 17.217  | <b>0.00005*</b> | <b>227A</b> (LOD 5.35)   | <b>227A</b> (LOD 4.15) | <b>227A (0.012**)</b>              | HK     |
|                            | 210 | 48.945         | 0.2331      |         |                 |                          |                        |                                    |        |
| RSO3 Area                  | 1   | 0.16           | 0.16048     | 0.6384  | 0.4252          | -                        | -                      | 55B (0.167); 229B (0.065)          | HK     |
|                            | 214 | 53.798         | 0.25139     |         |                 |                          |                        |                                    |        |
| RSO3 Area Residuals        | 1   | 0.014          | 0.013598    | 0.0539  | 0.8166          | -                        | -                      | -                                  | MR     |
|                            | 214 | 53.945         | 0.252078    |         |                 |                          |                        |                                    |        |
| LSO3 Area                  | 1   | 0.15           | 0.15017     | 0.5969  | 0.4406          | <b>55B</b> (LOD 4.02)    | <b>55B</b> (LOD 3.83)  | <b>55B (0.039**); 229B (0.082)</b> | HK     |
|                            | 210 | 52.831         | 0.25158     |         |                 |                          |                        |                                    |        |
| LSO3 Area Residuals        | 1   | 0.005          | 0.004662    | 0.0185  | 0.892           | -                        | -                      | 203F (0.057)                       | EM     |
|                            | 210 | 52.976         | 0.252269    |         |                 |                          |                        |                                    |        |
| RSO3 Number                | 1   | 0.025          | 0.025239    | 0.1001  | 0.752           | <b>206A</b> (LOD 5.34)   | <b>206A</b> (LOD 5.62) | <b>206A (0.003**)</b>              | HK     |
|                            | 214 | 53.933         | 0.252024    |         |                 |                          |                        |                                    |        |
| RSO4 Area                  | 1   | 0.034          | 0.033822    | 0.1342  | 0.7145          | -                        | -                      | -                                  | MR     |
|                            | 214 | 53.948         | 0.252092    |         |                 |                          |                        |                                    |        |
| RSO4 Area Residuals        | 1   | 0.597          | 0.59699     | 2.3931  | 0.1233          | -                        | -                      | -                                  | -      |
|                            | 214 | 53.384         | 0.24946     |         |                 |                          |                        |                                    |        |

|                     |     |        |          |        |        |   |   |              |    |
|---------------------|-----|--------|----------|--------|--------|---|---|--------------|----|
| LSO4 Area           | 1   | 0.304  | 0.30388  | 1.2106 | 0.2726 | - | - | 229B (0.464) | EM |
|                     | 193 | 48.445 | 0.25101  |        |        |   |   |              |    |
| LSO4 Area Residuals | 1   | 0.357  | 0.35721  | 1.4247 | 0.2341 | - | - | -            | -  |
|                     | 193 | 48.392 | 0.25073  |        |        |   |   |              |    |
| LSO4+5 Fusion       | 1   | 0.054  | 0.053678 | 0.213  | 0.6449 | - | - | -            | MR |
|                     | 211 | 53.167 | 0.251976 |        |        |   |   |              |    |
| RSO5 Area           | 1   | 0.068  | 0.068261 | 0.2709 | 0.6032 | - | - | NYU53 (0.23) | HK |
|                     | 214 | 53.913 | 0.251931 |        |        |   |   |              |    |
| RSO5 Area Residuals | 1   | 0.695  | 0.69548  | 2.7931 | 0.0961 | - | - | -            | -  |
|                     | 214 | 53.286 | 0.249    |        |        |   |   |              |    |
| LSO5 Area           | 1   | 0.011  | 0.011236 | 0.0445 | 0.8331 | - | - | -            | MR |
|                     | 193 | 48.727 | 0.252473 |        |        |   |   |              |    |
| LSO5 Area Residuals | 1   | 0.132  | 0.13198  | 0.5241 | 0.47   | - | - | -            | MR |
|                     | 193 | 48.606 | 0.25185  |        |        |   |   |              |    |

\* Indicates ANOVA result significant at  $p < 0.05$

\*\* Indicates covariate analysis result significant at  $p < 0.05$
